# Supplementary material
Source: Springer Nature journal article supplement (https://www.springermedizin.de/resource/supplementary/12888_2007_449_MOESM5_ESM.pdf/9483410)

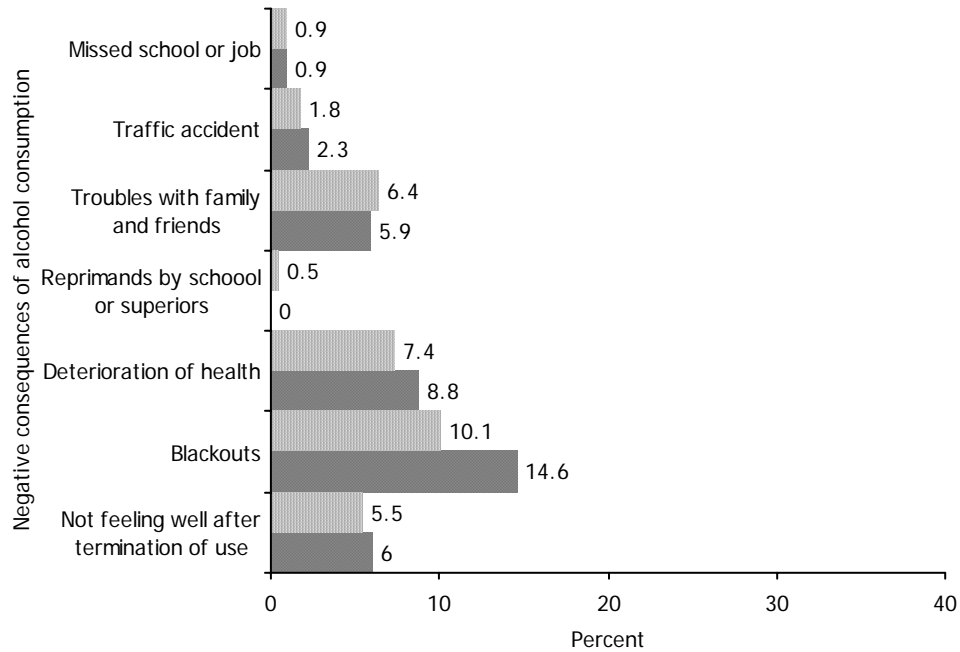

■ Females (1997) ■ Males (1997)

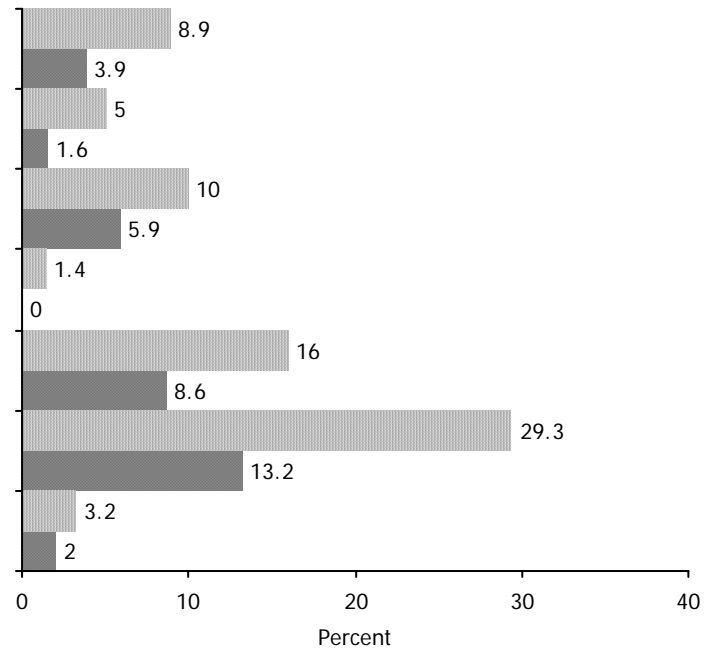

■ Females (2001) ■ Males (2001)

Supplement: MOESM5 [file 9483410]
